# Supplementary material for: Exploring the phytochemical and nutraceutical potentials of dasapatrachurnam
Source: publisher site journal article supplement (doi:10.1515/jcim-2018-0233), 2020-06-11
Supplement: Supplementary file 1 [file jcim-2018-0233ad.zip]

**Abbreviations**

BC Bowman’s capsule; C vascular congestion; CPT camptothecin; CV central vein; DBC destruction of Bowman’s capsule; DC degenerative changes; DMSO dimethyl sulfoxide; DPC dasapatrachurnam; ELISA enzyme linked immunosorbent assay; FBS fetal bovine serum; FTIR Fourier transform infrared spectroscopy; GC germinal centers; GL granular layer; HEK human embryonic kidney; MDC mild degenerative changes; ML molecular layer; MS marginal sinus; MTT 3-(4,5-dimethylthiazol-2-yl)-2,5-diphenyl tetrazolium bromide; MZ marginal zone; NC necrotic cells; PBS phosphate buffered saline; PT proximal tubule; RC regenerative changes; RT renal tubule; SR sinus region; SS sinusoid space; V vacuolization; WHO World Health Organization
